# Supplementary material for: Alterations of plasma exosomal proteins and motabolies are associated with the progression of castration-resistant prostate cancer
Source: PubMed Central journal article supplement (PMC9867857; doi:10.1186/s12967-022-03860-3), 2023-01-21

# Supplemental Figure 1

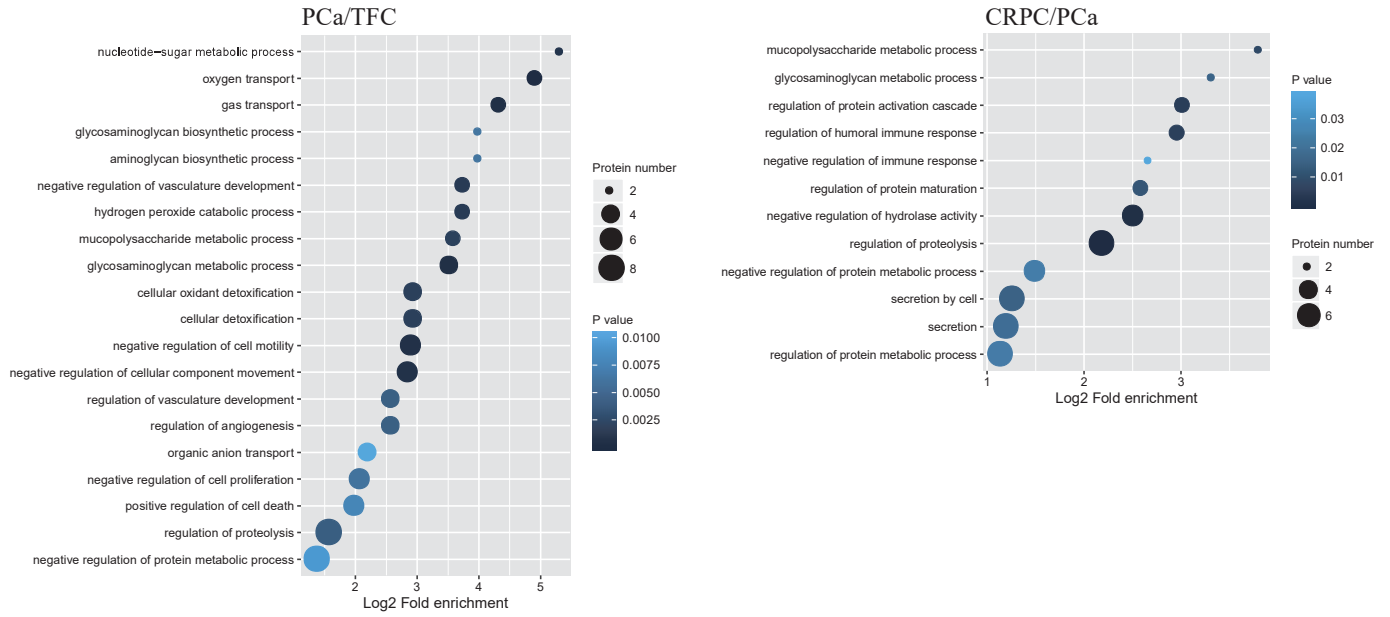

Supplementary Fig. 1. The GO enrichment analysis based on between comparisons PCa/TFC and CRPC/PCa.

# Supplemental Figure 2

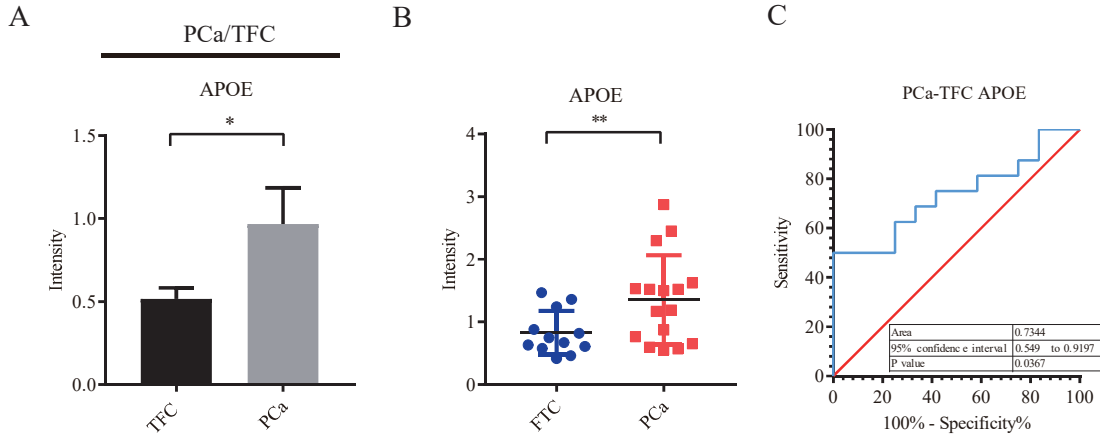

**D**

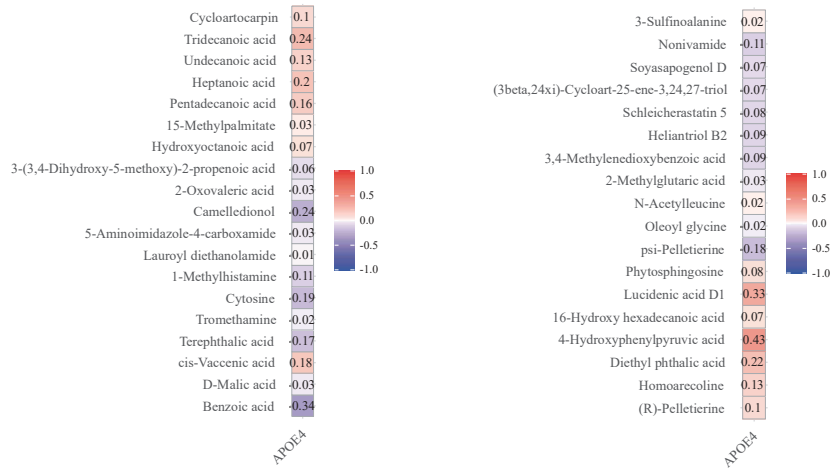

**E**

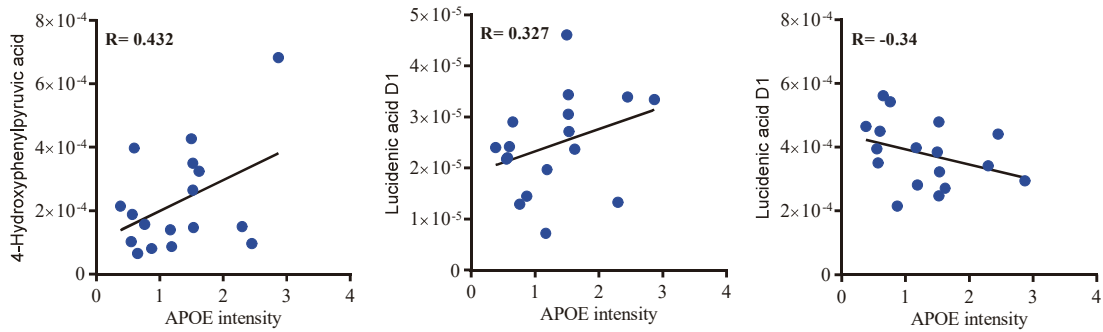

Supplement: 12967_2022_3860_MOESM1_ESM.pdf [file 12967_2022_3860_MOESM1_ESM.pdf]
